# Supplementary material
Source: ML conference proceedings conference paper supplement (https://proceedings.mlr.press/v37/tanga15.html)
Supplement: Supplementary file [file tanga15-supp.pdf]

## Supplementary Material

### 7.1. Proof of Proposition 1

*Proof.* 1. Any symmetric tensor  $Q$  that satisfies the conditions in part 1 of Proposition 1 is dual feasible. The decomposition measure  $\mu^*$  is primal feasible. We also have

$$\begin{aligned} \langle Q, A \rangle &= \sum_{p=1}^r \lambda_p \langle Q, x^p \otimes x^p \otimes x^p \rangle \\ &= \sum_{p=1}^r \lambda_p q(x^p) = \sum_{p=1}^r \lambda_p = \mu^*(\mathbb{S}^{n-1}), \end{aligned}$$

establishing a zero duality gap at the primal-dual feasible solution pair  $(\mu^*, Q)$ . Therefore,  $\mu^*$  is primal optimal and  $Q$  is dual optimal.

For uniqueness, suppose  $\hat{\mu}$  is another optimal solution. We then have

$$\begin{aligned} \mu^*(\mathbb{S}^{n-1}) &= \langle Q, A \rangle \\ &= \left\langle Q, \int_{\mathbb{S}^{n-1}} x \otimes x \otimes x d\hat{\mu} \right\rangle \\ &= \sum_{x \in \text{supp}(\mu^*)} \hat{\mu}(x) q(x) \\ &\quad + \int_{\mathbb{S}^{n-1}/\text{supp}(\mu^*)} q(x) d\hat{\mu} \\ &< \sum_{x_p \in \text{supp}(\mu^*)} \hat{\lambda}_p + \int_{\mathbb{S}^{n-1}/\text{supp}(\mu^*)} 1 d\hat{\mu} \\ &= \hat{\mu}(\mathbb{S}^{n-1}) \end{aligned}$$

due to condition (14) if  $\hat{\mu}(\mathbb{S}^{n-1}/\text{supp}(\mu^*)) > 0$ , contradicting the optimality of  $\hat{\mu}$ . So all optimal solutions are supported on  $\text{supp}(\mu^*)$ . Since the tensors  $\{x^p \otimes x^p \otimes x^p, p = 1, \dots, r\}$  are linearly independent, the coefficients are also uniquely determined.

2. Denote by  $p_0$  and  $d_0$  the optimal values for the primal problem (4) and the dual problem (5), respectively; and denote by  $p_1$  and  $d_1$  the optimal values for the primal-dual problems (9) and (12) (or (10)), respectively. We next argue that these four quantities are equal under the conditions in part 2. First, part 1 establishes  $p_0 = d_0$ . Second, weak duality and the construction of relaxations (9) and (12) imply that  $d_1 \leq p_1 \leq p_0 = d_0$ . Also the feasible set of (12) projected onto the  $Q$  space is a subset of the feasible set of (5). Since the conditions of part 2 state that the optimal dual solution  $Q$  of (5) is also feasible to (12), we hence conclude that  $Q$  is also an optimal solution of (12) and obtain  $d_1 = d_0$ . Therefore,  $p_0 = d_0 = d_1 = p_1$ , and the relaxations (9) and (12) are tight.

To show the optimality of  $y^*$ , the  $2k$ -truncation of the (infinite) moment vector  $\bar{y}^*$  corresponding to the measure  $\mu^*$ . We first note that  $y^*$  is feasible to (9). Then zero duality

gap, as verified below

$$y_0^* = \mu^*(\mathbb{S}^{n-1}) = p_0 = d_1 = \langle Q, A \rangle,$$

establishes the optimality of  $y^*$ .

3. Denote by  $\sigma(x) = \nu_k(x)' H \nu_k(x)$  the SOS polynomial associated with  $H$ . Note  $\nu_k(x^p)' H \nu_k(x^p) = \sigma(x^p) = 1 - q(x^p) = 0$  for  $p = 1, \dots, r$ , implying  $H \nu_k(x^p) = 0, p = 1, \dots, r$  due to  $H \succeq 0$ . Since  $\text{rank}(H) = |\mathbb{N}_k^n| - r$  by the assumption, the null space of  $H$  is  $\text{span}\{\nu_k(x^p), p = 1, \dots, r\}$ .

For any optimal solution  $\hat{y}$  of (9), complementary slackness implies that

$$H M_k(\hat{y}) = 0.$$

So the eigen-space corresponding to the non-zero eigenvalues of  $M_k(\hat{y})$  is a subspace of  $\text{span}\{\nu_k(x^p), p = 1, \dots, r\}$ . We hence write

$$M_k(\hat{y}) = V D V'$$

where  $V = [\nu_k(x^1) \cdots \nu_k(x^r)]$  and  $D$  is an  $r \times r$  semidefinite matrix (not necessarily diagonal at this point). Note that  $M_k(y^*) = V \Lambda V'$  where  $\Lambda = \text{diag}([\lambda_1, \dots, \lambda_r])$ . We next argue that  $D = \Lambda$ .

The moment matrix  $M_k(\hat{y})$  contains a known submatrix specified by the third order moments in the tensor  $A$ , and hence is equal to the corresponding submatrix in  $M_k(y^*)$ . More precisely,  $M_k(\hat{y})$  contains the block (at the location indicated by the orange color in Figure 5):

$$\begin{aligned} &\int_{\mathbb{S}^{n-1}} \begin{bmatrix} x_1 \\ \vdots \\ x_n \end{bmatrix} \begin{bmatrix} x_1^2 & x_1 x_2 & \cdots & x_{n-1} x_n & x_n^2 \end{bmatrix} d\mu^* \\ &= X \Lambda V_2' \end{aligned}$$

where  $X = [x^1 \cdots x^p]$ , and  $V_2$  is the submatrix of  $V$  whose rows correspond to the second-order monomials in  $\nu_k(x)$ . Therefore, we have

$$X \Lambda V_2' = X D V_2' \quad (25)$$

According to Lemma 3.1 (ii) of (De Lathauwer, 2008),  $\text{rank}(X) = r$  implies  $\text{rank}(V_2) = r$ . Multiplying both sides of (25) by the pseudo-inverse matrices  $X^\dagger$  from the left and  $(V_2')^\dagger$  from the right yield  $D = \Lambda$ . So  $M_k(\hat{y}) = M_k(y^*)$ , and  $\hat{y} = y^*$  is the unique solution of (9).

To see that we can extract the measure  $\mu^*$  from  $M_k(\hat{y}) = M_k(y^*)$ , we note that the matrix  $M_k(y^*) = V \Lambda V'$  has rank  $r$  for all  $k \geq 1$ . Hence the flat extension condition  $\text{rank}(M_{k-1}(y^*) = M_k(y^*))$  is satisfied for all  $k \geq 2$ . Therefore, according to (Curto & Fialkow, 1996; Henrion & Lasserre, 2005), we could recover the measure from the moment matrix  $M_k(y^*)$ .  $\square$

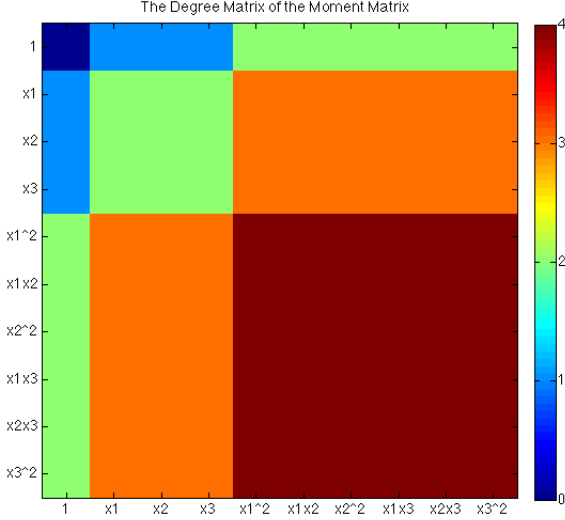

Figure 5. The colors encode the degrees of the entries in the moment matrix for an instance with  $n = 3$ ,  $k = 2$ .

## 7.2. Dual Certificate: the Orthonormal Case

The proof of Theorem 1 is based on a perturbation analysis of the orthogonal case, which is the focus of this and the next sections. Hereafter, the relaxation order is fixed to  $k = 2$ .

When the vectors  $\{x^p, p = 1, \dots, r\}$  are orthonormal, we verify that the symmetric tensor

$$Q = \sum_{p=1}^r x^p \otimes x^p \otimes x^p$$

satisfies the conditions in part 1 of Proposition 1. To see this, note

$$q(x^p) = \langle Q, x^p \otimes x^p \otimes x^p \rangle = \sum_{p'=1}^r \langle x^{p'}, x^p \rangle^3 = 1.$$

Moreover, for any fixed  $x \in \mathbb{S}^{n-1}$  we have

$$\begin{aligned} q(x) &= \langle Q, x \otimes x \otimes x \rangle = \sum_{p=1}^r \langle x^p, x \rangle^3 \\ &\leq \max_p \langle x^p, x \rangle \sum_{p=1}^r \langle x^p, x \rangle^2 \\ &\leq \|X^T x\|_2^2 \end{aligned}$$

where we used  $\max_p \langle x^p, x \rangle \leq \max_p \|x^p\| \|x\| = 1$  for all  $p$ . Due to the orthogonality of the columns of  $X = [x^1 \dots x^r]$ , we clearly have  $\|X^T x\|_2^2 \leq \|x\|_2^2 = 1$ . For  $q(x) = 1$ , all the involved inequalities must be equalities. For  $\max_p \langle x^p, x \rangle = 1$ , we need  $x = x^p$  for some  $p$ , which is the only possible case that  $q(x) = 1$ . For all other cases,  $q(x) < 1$ . Therefore,  $Q = \sum_p x^p \otimes x^p \otimes x^p$  satisfies

the conditions of part 1 in Proposition 1. This argument combined with part 1 of Proposition 1 lead to

**Theorem 3.** *If the vectors in  $\text{supp}(\mu^*)$  are orthonormal, then  $\mu^*$  is the unique optimal solution to (4).*

## 7.3. SOS Dual Certificate: the Orthonormal Case

In the following, we show that for  $q(x) = \sum_{p=1}^r \langle x, x^p \rangle^3$ , we can find an SOS  $\sigma(x)$  and a polynomial  $s(x)$  with degrees 4 and 2 respectively, such that

$$1 - q(x) = \sigma(x) + s(x)(\|x\|_2^2 - 1).$$

We start with assuming  $x^p = e_p$ , the  $p$ th canonical basis vector, for  $p = 1, 2, \dots, r$ , in which case  $q(x)$  becomes  $\sum_{p=1}^r x_p^3$ . Later on we will apply a rotation to derive the general case from this special case.

We set

$$s(x) = -\frac{3}{2} \left( \sum_{p=1}^r x_p^2 \right) - \frac{3}{2} \left( \sum_{p=r+1}^n x_p^2 \right) = \nu_1(x)' G_0 \nu_1(x)$$

where

$$G_0 := \begin{bmatrix} 0 & \\ & -\frac{3}{2} I_n \end{bmatrix}. \quad (26)$$

Consider

$$\begin{aligned} &1 - q(x) - s(x)(\|x\|_2^2 - 1) \\ &= 1 - \sum_{p=1}^r x_p^3 + \frac{3}{2} \left( \sum_{p=1}^r x_p^2 \right) \left( \sum_{p=1}^n x_p^2 - 1 \right) \\ &\quad + \frac{3}{2} \left( \sum_{p=r+1}^n x_p^2 \right) \left( \sum_{p=1}^n x_p^2 - 1 \right) \\ &= 1 - \frac{3}{2} \left( \sum_{p=1}^r x_p^2 \right) - \frac{3}{2} \left( \sum_{p=r+1}^n x_p^2 \right) - \sum_{p=1}^r x_p^3 \\ &\quad + \frac{3}{2} \sum_{p=1}^r x_p^4 + \frac{3}{2} \sum_{p=r+1}^n x_p^4 \\ &\quad + 3 \sum_{p < p'=1}^r x_p^2 x_{p'}^2 + 3 \sum_{p < p'=r+1}^n x_p^2 x_{p'}^2 + 3 \sum_{p=1}^r \sum_{p'=1}^n x_p^2 x_{p'}^2. \end{aligned} \quad (27)$$

We show that this polynomial is an SOS  $\sigma(x)$  with Gram matrix  $H_0$  defined on top of the next page. Here the row partition of  $H_0$  corresponds to the partition of the Veronese

$$H_0 := \begin{bmatrix} 1 & & & & & -\mathbf{1}'_r & & f\mathbf{1}'_{n-r} \\ & \frac{1}{2}I_r & & & & -\frac{1}{2}I_r & & \\ & & aI_{n-r} & & & & & \\ & & & IC_2^r & & & & \\ & & & & bI_{r(n-r)} & & & \\ & & & & & cI_{C_2^{n-r}} & & \\ -\mathbf{1}_r & -\frac{1}{2}I_r & & & & \frac{1}{2}I_r + \mathbf{1}_r\mathbf{1}'_r & & d\mathbf{1}_r\mathbf{1}'_{n-r} \\ f\mathbf{1}_{n-r} & & & & & d\mathbf{1}_{n-r}\mathbf{1}'_r & (\frac{3}{2} - e)I_{n-r} + e\mathbf{1}_{n-r}\mathbf{1}'_{n-r} & \end{bmatrix} \quad (28)$$

map  $\nu_2(x)$  given in the following

$$\nu_2(x) := \begin{bmatrix} \nu_2^0(x) \\ \nu_2^1(x) \\ \nu_2^2(x) \\ \nu_2^3(x) \\ \nu_2^4(x) \\ \nu_2^5(x) \\ \nu_2^6(x) \\ \nu_2^7(x) \end{bmatrix} \quad (29)$$

with

$$\begin{aligned} \nu_2^0(x) &= 1 \\ \nu_2^1(x) &= \begin{bmatrix} x_1 \\ \vdots \\ x_r \end{bmatrix} \\ \nu_2^2(x) &= \begin{bmatrix} x_{r+1} \\ \vdots \\ x_n \end{bmatrix} \\ \nu_2^3(x) &= \begin{bmatrix} x_1x_2 \\ x_1x_3 \\ \vdots \\ x_{r-1}x_r \end{bmatrix} \\ \nu_2^4(x) &= \begin{bmatrix} x_1x_{r+1} \\ \vdots \\ x_rx_n \end{bmatrix} \\ \nu_2^5(x) &= \begin{bmatrix} x_{r+1}x_{r+2} \\ \vdots \\ x_{n-1}x_n \end{bmatrix} \\ \nu_2^6(x) &= \begin{bmatrix} x_1^2 \\ \vdots \\ x_r^2 \end{bmatrix} \\ \nu_2^7(x) &= \begin{bmatrix} x_{r+1}^2 \\ \vdots \\ x_n^2 \end{bmatrix} \end{aligned}$$

and  $a, b, c, d, e, f$  are parameters to be determined later.

Since

$$\begin{aligned} &\nu_2(x)'H_0\nu_2(x) \\ &= 1 - \frac{3}{2} \sum_{p=1}^r x_p^2 + (a + 2f) \sum_{p=r+1}^n x_p^2 - \sum_{p=1}^r x_p^3 \\ &\quad + \frac{3}{2} \sum_{p=1}^r x_p^4 + \frac{3}{2} \sum_{p=r+1}^n x_p^4 \\ &\quad + 3 \sum_{p < p'=1}^r x_p^2 x_{p'}^2 + (c + 2e) \sum_{p < p'=r+1}^n x_p^2 x_{p'}^2 \\ &\quad + (b + 2d) \sum_{p=1}^r \sum_{p'=1}^n x_p^2 x_{p'}^2 \end{aligned}$$

comparison of coefficients with those of  $1 - q(x) - s(x)(\|x\|_2^2 - 1)$  in (27) gives

$$\begin{aligned} a + 2f &= -\frac{3}{2} \\ c + 2e &= 3 \\ b + 2d &= 3 \end{aligned}$$

We will judiciously choose the parameters so that  $H_0$  is PSD. Note that  $H_0$  must have  $r$  zero eigenvalues with eigenvectors  $\{\nu_2(e^p) : p = 1, \dots, r\}$ . For later analysis, we also need  $H_0$  to have precisely  $r$  zero eigenvalues, and the smallest non-zero eigenvalue of  $H_0$  to be lower bounded by a numerical constant regardless of  $n$  and  $r$ .

For that purpose, we next find all the eigenvalues of  $H_0$ . The obvious ones include  $a, 1, b$  and  $c$  of multiplicities  $n - r, C_2^r, r(n - r)$  and  $C_2^{n-r}$ , respectively. The rest of eigenvalues are those of  $E$  defined as

$$E = \begin{bmatrix} 1 & & -\mathbf{1}'_r & & f\mathbf{1}'_{n-r} \\ & \frac{1}{2}I_r & -\frac{1}{2}I_r & & \\ -\mathbf{1}_r & -\frac{1}{2}I_r & \frac{1}{2}I_r + \mathbf{1}_r\mathbf{1}'_r & & d\mathbf{1}_r\mathbf{1}'_{n-r} \\ f\mathbf{1}_{n-r} & & d\mathbf{1}_{n-r}\mathbf{1}'_r & (\frac{3}{2} - e)I_{n-r} + e\mathbf{1}_{n-r}\mathbf{1}'_{n-r} & \end{bmatrix}$$

We choose  $e + a = \frac{3}{2}$  and decompose  $E$  as  $A + B$  such that  $A$  is

$$A = \begin{bmatrix} 1 & & -\mathbf{1}'_r & & f\mathbf{1}'_{n-r} \\ & \frac{1}{2r}\mathbf{1}_r\mathbf{1}'_r & -\frac{1}{2r}\mathbf{1}_r\mathbf{1}'_r & & \\ -\mathbf{1}_r & -\frac{1}{2r}\mathbf{1}_r\mathbf{1}'_r & (1 + \frac{1}{2r})\mathbf{1}_r\mathbf{1}'_r & & d\mathbf{1}_r\mathbf{1}'_{n-r} \\ f\mathbf{1}_{n-r} & & d\mathbf{1}_{n-r}\mathbf{1}'_r & (e + \frac{a}{(n-r)})\mathbf{1}_{n-r}\mathbf{1}'_{n-r} & \end{bmatrix}$$

and  $B$  is

$$\begin{bmatrix} 0 & & & \\ & \frac{1}{2}(I_r - \frac{1}{r}\mathbf{1}_r\mathbf{1}'_r) & -\frac{1}{2}(I_r - \frac{1}{r}\mathbf{1}_r\mathbf{1}'_r) & \\ & -\frac{1}{2}(I_r - \frac{1}{r}\mathbf{1}_r\mathbf{1}'_r) & \frac{1}{2}(I_r - \frac{1}{r}\mathbf{1}_r\mathbf{1}'_r) & \\ & & & * \end{bmatrix}$$

where the bottom-right block of  $B$  occupied by  $*$  is  $a(I_{n-r} - \frac{1}{n-r}\mathbf{1}_{n-r}\mathbf{1}'_{n-r})$ . It is easy to verify that  $AB = BA = 0$ . Hence the eigenvalues of  $E$  consist of those of  $A$  and  $B$ . The eigenvalues of  $B$  are 0, 1, and  $a$  of multiplicities  $r + 3, r - 1, n - r - 1$ , respectively.

Next we choose the parameters such that the eigenvalues of  $A$  are easy to compute. We first ensure that  $A$  has rank 3, which, by rank invariance of Gaussian elimination, requires the following matrix,

$$\begin{bmatrix} 1 & & & \\ & \frac{1}{2r}\mathbf{1}_r\mathbf{1}'_r & & \\ & & \mathbf{0}_r & (d+f)\mathbf{1}_r\mathbf{1}'_{n-r} \\ & & (d+f)\mathbf{1}_{n-r}\mathbf{1}'_r & * \end{bmatrix}$$

whose bottom-right block is  $(e + \frac{a}{(n-r)} - f^2)\mathbf{1}_{n-r}\mathbf{1}'_{n-r}$ , to have rank 3, or equivalently,  $d + f = 0$ .

Multiplying  $A$  with a vector of the form  $v := \begin{bmatrix} \alpha \\ \beta\mathbf{1}_r \\ \gamma\mathbf{1}_r \\ \delta\mathbf{1}_{n-r} \end{bmatrix}$

shows that the eigenvectors of  $A$  are of the form  $v$ . Consequently, the non-zero eigenvalues of  $A$  can be computed by solving a smaller set of eigenvalue equations

$$\begin{bmatrix} 1 & 0 & -r & f(n-r) \\ 0 & 1/2 & -1/2 & 0 \\ -1 & -1/2 & r+1/2 & -f(n-r) \\ f & 0 & -fr & (n-r)e+a \end{bmatrix} \begin{bmatrix} \alpha \\ \beta \\ \gamma \\ \delta \end{bmatrix} = \lambda \begin{bmatrix} \alpha \\ \beta \\ \gamma \\ \delta \end{bmatrix} \quad (30)$$

We already have five equations on  $a, b, c, d, e, f$ :

$$\begin{aligned} a + 2f &= -\frac{3}{2} \\ c + 2e &= 3 \\ b + 2d &= 3 \\ e + a &= \frac{3}{2} \\ d + f &= 0 \end{aligned}$$

or,

$$\begin{aligned} b &= 3 - 2d = 3 - \frac{3}{2} - a = \frac{3}{2} - a \\ c &= 3 - 2e = 2a \\ d &= \frac{3}{4} + \frac{a}{2} \\ e &= \frac{3}{2} - a \\ f &= -\frac{3}{4} - \frac{a}{2} \end{aligned}$$

Plugging these into the matrix in (30) leads to a matrix involving a single parameter  $a$ :

$$\begin{bmatrix} 1 & 0 & -r & -(\frac{3}{4} + \frac{a}{2})(n-r) \\ 0 & 1/2 & -1/2 & 0 \\ -1 & -1/2 & r+1/2 & (\frac{3}{4} + \frac{a}{2})(n-r) \\ -(\frac{3}{4} + \frac{a}{2}) & 0 & (\frac{3}{4} + \frac{a}{2})r & (n-r)(\frac{3}{2} - a) + a \end{bmatrix}$$

Symbolic calculation shows that the non-zero eigenvalues of this matrix are zeros of the polynomial

$$\begin{aligned} h(\lambda; r, n, a) &= (2+r)(15(-n+r) \\ &+ 4a(-4 + (7+a)n - (7+a)r)) \\ &+ 2(16 + 39n - 31r + 15(n-r)r \\ &- 4a^2(n-r)(1+r) + 4a((1+r)(8+7r) - n(11+7r)))\lambda \\ &+ 16(-4 - 3n + 2a(-1 + n - r) + r)\lambda^2 + 32\lambda^3 \end{aligned}$$

We want to make sure  $\lambda = a \neq 0$  is one non-zero eigenvalue, which means  $h(a; r, n, a) = 0$ , or after simplification:

$$\begin{aligned} a^3(r-3) + 15(r+2) + 4a^2(13r+32) - 2a(29r+67) \\ = 0 \end{aligned}$$

We pick the smallest positive root branch  $a = a(r)$ , which is an increasing function of  $r$  with limit  $a(+\infty) = \frac{1}{2}$ , and  $a(1) > 0.3387$ . We next argue that, after plugging  $a = a(r)$ ,  $h(\lambda; r, n, a(r))$  has two other zeros that are larger than  $\frac{1}{2}$  (hence larger than  $a(r)$ ), which means the other two non-zero eigenvalues of  $A$  are greater than  $a(r) \in (0.3387, 0.5)$ . The argument is based on median value theorem by showing  $h(1/2; r, n, a(r)) > 0$ ,  $h(n/2; r, n, a(r)) < 0$  combined with the obvious fact  $\lim_{\lambda \rightarrow \infty} h(\lambda; r, n, a(r)) = +\infty$ .

We first show  $h(1/2; r, n, a) > 0$  for  $1 \leq r \leq n$  and  $a \in [0.2, 0.5)$ . As a function of  $r$  with parameters  $n$  and  $a$ , the function

$$\begin{aligned} h(1/2; r, n, a) &= 4 - 8a - 3n + 20an + 4a^2n \\ &+ (3 - 20a - 4a^2)r \end{aligned}$$

is linear in  $r$  and is decreasing since  $3 - 20a - 4a^2 < 0$  for

$a \in [0.2, 0.5)$ . Therefore, we obtain

$$\begin{aligned} h(1/2; r, n, a) &\geq h(1/2; n, n, a) \\ &= 4 - 8a \\ &> 0. \end{aligned}$$

Second, we show that  $h(n/2; r, n, a) < 0$  for  $a \in [0.2, 0.5)$  and  $r \in [0, n]$ :

$$\begin{aligned} &h(n/2; r, n, a) \\ &= (-2 + n)(16a + (7 - 4a(9 + a))n + 8(-1 + a)n^2) \\ &\quad + (30 - 8a(9 + a) - 46n + 8a(11 + a)n \\ &\quad + (19 - 4a(9 + a))n^2)r + (-1 + 2a)(15 + 2a)(-1 + n)r^2 \\ &\leq (-2 + n)(16a + (7 - 4a(9 + a))n \\ &\quad + 8(-1 + a)n^2) + 2(1 - 2a)(15 + 2a)(-1 + n)nr \\ &\quad + (-1 + 2a)(15 + 2a)(-1 + n)r^2. \end{aligned}$$

We used the fact that

$$\begin{aligned} &30 - 8a(9 + a) - 46n + 8a(11 + a)n + (19 - 4a(9 + a))n^2 \\ &\leq 2(1 - 2a)(15 + 2a)(n - 1)n \end{aligned}$$

which can be proved by observing that

$$\begin{aligned} &2(1 - 2a)(15 + 2a)(n - 1)n - (30 - 8a(9 + a) - 46n \\ &\quad + 8a(11 + a)n + (19 - 4a(9 + a))n^2) \\ &= -30 + 8a(9 + a) \\ &\quad + (46 - 8a(11 + a) - 2(1 - 2a)(15 + 2a))n \\ &\quad + (-19 + 4a(9 + a) + 2(1 - 2a)(15 + 2a))n^2 \end{aligned}$$

is an increasing function of  $n$  (since  $(46 - 8a(11 + a) - 2(1 - 2a)(15 + 2a)) > 0$  for  $a \in [0.2, 0.5)$ ), and its value at  $n = 1$  is  $-3 + 12a(9 + a) - 8a(11 + a) \geq 1$ .

Now the upper bound on  $h(n/2; r, n, a)$  is an increasing function of  $r$  for  $r \in [1, n]$ . We therefore further bound  $h(n/2; r, n, a)$  by setting  $r = n$  in its upper bound:

$$\begin{aligned} h(n/2; r, n, a) &\leq -32a - 14n + 8a(11 + a)n \\ &\quad + 8(1 - 3a)n^2 + (7 - 4a(5 + a))n^3 \\ &:= u(n; a) \end{aligned}$$

Since  $\frac{d}{dn}u(n; a)$  is

$$\begin{aligned} &-14 + 8a(11 + a) + 16(1 - 3a)n + 3(7 - 4a(5 + a))n^2, \\ &\text{which is decreasing for } n \geq 0 \text{ due to } 3(7 - 4a(5 + a)) < 0 \\ &\text{and } 16(1 - 3a) < 0 \text{ when } a \in (0.3387, 0.5), \text{ we have} \end{aligned}$$

$$\begin{aligned} \frac{d}{dn}u(n; a) &\leq \frac{d}{dn}u(8; a) \\ &= 1458 - 8a(517 + 95a) \\ &< 0 \end{aligned}$$

for  $n \geq 8$  and  $a \in (0.3387, .5)$ . Therefore,  $u(n; a)$  is

further upper bounded by its value at  $n = 8$  for  $n \geq 8$ :

$$\begin{aligned} h(n/2; r, n, a) &\leq u(8; a) = -16(-249 + 2a(347 + 62a)) \\ &< 0 \end{aligned}$$

for  $a \in (0.3387, .5)$ .

To sum, we have showed that  $h(\lambda; r, n, a(r))$ , whose zeros are eigenvalues of  $A$ , has the property that  $\lambda_1 = a(r) \in (0.3387, 1/2)$  is a zero, and  $h(1/2; r, n, a(r)) > 0$ ,  $h(n/2; r, n, a(r)) < 0$ , and  $h(+\infty; r, n, a) > 0$ . Therefore, the other two zeros of  $h(\lambda; r, n, a(r))$  are greater than  $1/2 > a(r)$ .

Therefore, the matrix  $H_0$  has rank  $|\mathbb{N}_2^n| - r$  and the minimal non-zero eigenvalue for  $H_0$  is

$$\min \left\{ a(r), \frac{3}{2} - a(r), 2a(r), \frac{1}{2}, 1 \right\} = a(r)$$

since  $a(r) \in (0.3387, 1/2)$ . This shows that, when  $\{x^p = e_p, p = 1, \dots, r\}$ , the matrix  $H_0$  is PSD with rank  $|\mathbb{N}_2^n| - r$  and the minimal non-zero eigenvalue is greater than  $1/3$ .

When  $\text{supp}(\mu^*)$  is orthonormal, but is not a subset of the canonical basis vectors, we augment the matrix  $X = [x^1 \ \dots \ x^r]$  to an orthonormal matrix  $P = [X \ P_1]$  and transform the variable  $x$  to  $z = P'x = P^{-1}x$ . Then the tensor  $A = \sum_p \lambda_p x^p \otimes x^p \otimes x^p$  is transformed to  $\sum_p \lambda_p e_p \otimes e_p \otimes e_p$ . So the dual polynomial

$$q_0(z) = 1 - \nu_2(z)' H_0 \nu_2(z) + \frac{3}{2} \|z\|_2^2 (\|z\|_2^2 - 1)$$

with  $H_0$  constructed above satisfies the conditions in Proposition 1, and certifies the optimality of the decomposition  $\sum_p \lambda_p e_p \otimes e_p \otimes e_p$ . We transform this polynomial back to the  $x$ -domain to obtain

$$\begin{aligned} q(x) &:= q_0(P'x) \\ &= 1 - \nu_2(P'x)' H_0 \nu_2(P'x) + \frac{3}{2} \|x\|_2^2 (\|x\|_2^2 - 1) \end{aligned}$$

where we have used  $\|P'x\|_2^2 = \|x\|_2^2$  since  $P$  is orthonormal. According to the change of basis formula in Lemma 1, the polynomial

$$\nu_2(P'x) H_0 \nu_2(P'x) = \nu_2(x)' (J' H_0 J) \nu_2(x)$$

is an SOS with the Gram matrix  $J' H_0 J$ , whose smallest eigenvalue is greater than  $\frac{1}{2} \times \frac{1}{3} > \frac{1}{6}$ . One can verify that  $q(x)$  satisfies all the conditions in Proposition 1. As a consequence, we obtain:

**Theorem 4.** *If the vectors in  $\text{supp}(\mu^*)$  are orthonormal, then the SDP relaxation (9) with  $k = 2$  gives the exact decomposition. Furthermore, the constructed dual polynomial has the form*

$$q(x) = 1 - \nu_2(x)' H \nu_2(x) + \frac{3}{2} \|x\|_2^2 (\|x\|_2^2 - 1)$$

where  $H$  has  $r$  zero eigenvalues, and the  $(r + 1)$ th smallest eigenvalue is greater than  $\frac{1}{6}$ . When the support is formed

by a subset of the canonical basis vectors, the lower bound on the  $(r + 1)$ th smallest eigenvalue can be chosen as  $\frac{1}{3}$ .

The SOS matrix decomposition is verified by Matlab. With  $n = 7$  and  $r = 3$ , we have the following plot for  $H_0$ :

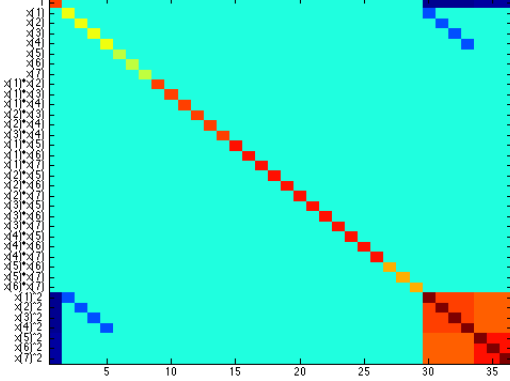

Figure 6.  $H_0$  has  $r = 4$  zero eigenvalues and the 5th smallest is  $a(4) = 0.3789$ .

#### 7.4. Dual Certificate: The Non-Orthonormal Case

We now proceed to apply a perturbation analysis to construct a dual polynomial for the non-orthonormal case.

Suppose the measure  $\mu^* = \sum_{k=1}^r \lambda_k \delta(x - x^k)$  where  $\{x^k, k = 1, \dots, r\}$  are not orthogonal. Define  $X = [x^1, \dots, x^r]$  and find  $P_1 \in \mathbb{R}^{n \times (n-r)}$  which has orthonormal columns and is orthogonal to  $X$ . Further define  $P = [X \ P_1]$ . Then the transformation  $x \mapsto z = P^{-1}x$  maps  $x^k$  to the  $k$ th canonical basis vector  $e_k$ . The unit sphere is mapped to an ellipsoid  $E^{n-1} = \{z : z'P'Pz = 1\}$ .

If we could construct a polynomial  $q(z) = \langle Q, z \otimes z \otimes z \rangle$  with symmetric  $Q$  such that

$$q(e_k) = 1, k = 1, \dots, r \quad (31)$$

$$|q(z)| < 1, z \in E^{n-1}, z \neq e_k \quad (32)$$

then the polynomial  $q_1(x) := q(P^{-1}x) = \langle Q, P^{-1}x \otimes P^{-1}x \otimes P^{-1}x \rangle$  would satisfy

$$\begin{aligned} q_1(x^k) &= q(e_k) = 1, k = 1, \dots, r \\ |q_1(x)| &= |q(P^{-1}x)| < 1, x \in \mathbb{S}^{n-1}, x \neq x^k. \end{aligned}$$

The desired  $q(z)$  must satisfy that  $q(e_k) = 1$  and  $q(z)$  achieves maximum at  $z = e_k$  for  $k = 1, \dots, r$ . Denote  $L(z; \nu) = q(z) - \nu(z'P'Pz - 1)$  as the Lagrangian. A necessary condition for  $q(z)$  to achieve maximum at  $e_k$  is

given by the KKT condition:

$$\begin{aligned} \frac{\partial L(z)}{\partial z} \Big|_{z=e_k} &= \frac{\partial q(z)}{\partial z} \Big|_{z=e_k} - \nu \frac{\partial}{\partial z} (z'P'Pz - 1) \Big|_{z=e_k} \\ &= 3 \sum_{i=1}^n \langle Q, e_k \otimes e_k \otimes e_i \rangle e_i - 2\nu P'Pe_k \\ &= 0 \end{aligned}$$

Taking inner product with  $e_k$  yields

$$3q(e_k) = 3\langle Q, e_k \otimes e_k \otimes e_k \rangle = 2\nu e_k' P'Pe_k = 3,$$

implying  $\nu = \frac{3}{2}$ . Therefore, the symmetric tensor  $Q$  must satisfy

$$\sum_{i=1}^n \langle Q, e_k \otimes e_k \otimes e_i \rangle e_i = P'Pe_k, k = 1, \dots, r. \quad (33)$$

Note the condition (31) is a consequence of (33). We pick

$$\begin{aligned} Q &= \sum_{k=1}^r e_k \otimes e_k \otimes P'Pe_k + \sum_{k=1}^r e_k \otimes P'Pe_k \otimes e_k \\ &\quad + \sum_{k=1}^r P'Pe_k \otimes e_k \otimes e_k - 2 \sum_{k=1}^r e_k \otimes e_k \otimes e_k \end{aligned}$$

which actually has minimal energy among all symmetric  $Q$ s that satisfy (33). The dual polynomial is then given by

$$\begin{aligned} q(z) &= \langle Q, z \otimes z \otimes z \rangle \\ &= \sum_{k=1}^r [3z_k^2 (z'P'Pe_k) - 2z_k^3] \\ &= \sum_{k=1}^r [3(z'P'Pe_k) - 2z_k] z_k^2. \end{aligned}$$

Clearly,  $q(z)$  satisfies the interpolation condition (31). In the following, we show that  $q(z)$  also satisfies the condition (32). The argument is based on partitioning the ellipsoid  $E^{n-1}$  into a region that is far from any  $e_k$  and a region that is near to some  $e_k$ .

First note

$$q(z) \leq \max_k [3(z'P'Pe_k) - 2z_k] \sum_{k=1}^r z_k^2$$

When  $z \in E^{n-1}$ , due to  $\|P'P - I\| \leq \epsilon$ , we have  $-\epsilon z'z \leq 1 - z'z \leq \epsilon z'z$ , implying

$$\frac{1}{1 + \epsilon} \leq z'z \leq \frac{1}{1 - \epsilon}$$

Therefore, we can further upper bound  $q(z)$  as

$$\begin{aligned} q(z) &\leq \max_k [3(z'P'Pe_k) - 2z_k] \sum_{k=1}^r z_k^2 \\ &\leq \frac{1}{1 - \epsilon} \max_k [3(z'P'Pe_k) - 2z_k] \end{aligned}$$

So, if

$$\max_k [3(z'P'Pe_k) - 2z_k] < 1 - \epsilon$$

then  $q(z) < 1$ . Therefore, we have showed that  $q(z) < 1$  in the ‘‘far-away’’ region.

Define  $N_k = \{z : 3(z'P'Pe_k) - 2z_k \geq 1 - \epsilon, z'P'Pz = 1\}$ . When  $P'P \approx I$ , this is saying  $z_k \geq 1 - \epsilon$ , so  $z \in N_k$  is close to  $e_k$ . The union of  $N_k$ s defines the ‘‘near region’’.

We want to make sure that  $q(z)$  is strictly less than 1 in each  $N_k$  except when  $z = e_k \in N_k$ . For that purpose, we perform a Taylor expansion of the Lagrangian  $L(z) := L(z; 3/2)$  in  $N_k$  around  $z = e_k$

$$\begin{aligned} L(z) &= q(z) - \frac{3}{2}(z'P'Pz - 1) \\ &= L(e_k) + (z - e_k)' \frac{\partial L}{\partial z} \Big|_{z=e_k} \\ &\quad + \frac{1}{2}(z - e_k)' H(\xi_z)(z - e_k) \\ &= 1 + \frac{1}{2}(z - e_k)' H(\xi_z)(z - e_k) \end{aligned}$$

where  $H(\xi_z)$  is the Hessian of  $L(z)$  evaluated at  $\xi_z$  and  $\xi_z \in L_{k,z} = \{tz + (1-t)e_k : t \in (0, 1)\}$ , the line segment connecting  $e_k$  and  $z$ .

Since  $q(z) = L(z)$  on the ellipsoid  $E^{n-1}$ , it suffices to show  $\frac{1}{2}(z - e_k)' H(\xi_z)(z - e_k) < 0$  for  $z \in N_k / \{e_k\}$ . For this purpose, we compute the Hessian matrix  $H(\xi)$ :

$$\begin{aligned} H(\xi) &= \frac{\partial}{\partial z} \left[ 3 \sum_{i=1}^n \langle Q, z \otimes z \otimes e_i \rangle e_i - 3P'Pz \right] \Big|_{z=\xi} \\ &= 6 \sum_{i,j=1}^n \langle Q, \xi \otimes e_j \otimes e_i \rangle e_i \otimes e_j - 3P'P \end{aligned}$$

Plugging in the expression of  $Q$ , we get that the Hessian  $H(\xi)$  equals

$$\begin{aligned} &6 \sum_{i,j=1}^n [\xi_j e_i' P' P e_j + \xi_i e_j' P' P e_i] e_i \otimes e_j \\ &\quad + 6 \sum_{i=1}^n [(\xi' P' P e_i) - 2\xi_i] e_i \otimes e_i - 3P'P \end{aligned}$$

To get a sense why this Hessian guarantees a negative second order term in the Taylor expansion, we set  $\xi = e_k$  to

get

$$\begin{aligned} H(e_k) &= 6 \sum_{i,j=1}^n [e_k(j) e_i' P' P e_j + e_k(i) e_j' P' P e_i] e_i \otimes e_j \\ &\quad + 6 \sum_{i=1}^n [(e_k' P' P e_i) - 2e_k(i)] e_i \otimes e_i - 3P'P \\ &= 6 \left[ \sum_i (e_i' P' P e_k) e_i \otimes e_k + \sum_j (e_j' P' P e_k) e_k \otimes e_j \right] \\ &\quad + 6 \sum_{i=1}^n [(e_k' P' P e_i) - 2e_k(i)] e_i \otimes e_i - 3P'P \end{aligned}$$

When  $P'P \approx I$ ,

$$\begin{aligned} H(e_k) &\approx 12e_k \otimes e_k - 6e_k \otimes e_k - 3I \\ &= 6e_k \otimes e_k - 3I \end{aligned}$$

which is PSD except in the direction  $e_k$ , which is orthogonal to the tangent space of  $E^{n-1} \approx S^{n-1}$  at  $z = e_k$ . Therefore, the Hessian projected onto the tangent space is negative definite, as desired.

Returning to the non-orthogonal case, we bound

$$\begin{aligned} H(\xi) &= 6 \sum_{i,j=1}^n [\xi_j e_i' P' P e_j + \xi_i e_j' P' P e_i] e_i \otimes e_j \\ &\quad + 6 \sum_{i=1}^n [(\xi' P' P e_i) - 2\xi_i] e_i \otimes e_i - 3P'P \end{aligned}$$

for  $\xi \in L_{k,z}$  with  $z \in N_k$ , where

$$N_k = \{z : 3(z'P'Pe_k) - 2z_k \geq 1 - \epsilon, z'P'Pz = 1\}.$$

The simplifications

$$\begin{aligned} \sum_{i,j=1}^n (\xi_j e_i' P' P e_j) e_i \otimes e_j &= P'P \text{diag}(\xi) \\ \sum_{i,j=1}^n (\xi_i e_j' P' P e_i) e_i \otimes e_j &= \text{diag}(\xi) P'P \\ \sum_{i=1}^n (\xi' P' P e_i) e_i \otimes e_i &= \text{diag}(P'P\xi) \\ \sum_{i=1}^n \xi_i e_i \otimes e_i &= \text{diag}(\xi) \end{aligned}$$

lead to the following compact expression for the Hessian matrix  $H(\xi)$ :

$$\begin{aligned} &6(P'P \text{diag}(\xi) + \text{diag}(\xi) P'P + \text{diag}(P'P\xi) - 2 \text{diag}(\xi)) \\ &\quad - 3P'P \end{aligned}$$

We want to show that

$$(z - e_k)' H(\xi)(z - e_k) < 0, \forall \xi \in L_{k,z}, z \in N_k.$$

We first argue that  $z \in N_k = \{z : 3(z'P'Pe_k) - 2z_k \geq 1 -$

$\epsilon, z'P'Pz = 1$  imposes certain restrictions on the size of  $z$ , and implies that  $z$  is close to  $e_k$ . Indeed,  $\|I - P'P\| \leq \epsilon$  and  $z'P'Pz = 1$  imply that

$$\frac{1}{1+\epsilon} \leq \frac{1}{\lambda_{\max}(P'P)} \leq \|z\|_2^2 \leq \frac{1}{\lambda_{\min}(P'P)} \leq \frac{1}{1-\epsilon}.$$

To show the closeness of  $z$  and  $e_k$ , we observe that

$$\begin{aligned} 3z'P'Pe_k - 2z_k &= 3z'(P'P - I)e_k + 3z'e_k - 2z_k \\ &= z_k + 3z'(P'P - I)e_k \end{aligned}$$

Since  $|3z'(P'P - I)e_k| \leq 3\|z\|_2\|P'P - I\| \leq \frac{3\epsilon}{\sqrt{1-\epsilon}}$ ,  $z_k$  is bounded from below as follows:

$$\begin{aligned} z_k &\geq 1 - \epsilon - 3z'(P'P - I)e_k \\ &\geq 1 - \epsilon - \frac{3\epsilon}{\sqrt{1-\epsilon}}. \end{aligned}$$

On the other hand,  $z_k \leq \|z\|_2 \leq \frac{1}{\sqrt{1-\epsilon}}$ .

A consequence of the sizes of  $z$  and  $z_k$  is that

$$\begin{aligned} \|z - z_k e_k\|_2^2 &= \sum_{j \neq k} z_j^2 \\ &= \|z\|_2^2 - z_k^2 \\ &\leq \frac{1}{1-\epsilon} - \left(1 - \epsilon - \frac{3\epsilon}{\sqrt{1-\epsilon}}\right)^2 \end{aligned}$$

Therefore, we have

$$\begin{aligned} &\|z - e_k\|_\infty \\ &\leq \max\left\{\epsilon + \frac{3\epsilon}{\sqrt{1-\epsilon}}, \frac{1}{\sqrt{1-\epsilon}} - 1, \right. \\ &\quad \left. \sqrt{\frac{1}{1-\epsilon} - \left(1 - \epsilon - \frac{3\epsilon}{\sqrt{1-\epsilon}}\right)^2}\right\} \\ &:= c_1(\epsilon) \\ &= O(\epsilon) \end{aligned}$$

and

$$\begin{aligned} &\|z - e_k\|_2^2 \\ &= \sum_{j \neq k} z_j^2 + (z_k - 1)^2 \leq \|z - z_k e_k\|_2^2 \\ &\quad + \max\left\{\epsilon + \frac{3\epsilon}{\sqrt{1-\epsilon}}, \frac{1}{\sqrt{1-\epsilon}} - 1\right\}^2 \\ &= \frac{1}{1-\epsilon} - \left(1 - \epsilon - \frac{3\epsilon}{\sqrt{1-\epsilon}}\right)^2 \\ &\quad + \max\left\{\epsilon + \frac{3\epsilon}{\sqrt{1-\epsilon}}, \frac{1}{\sqrt{1-\epsilon}} - 1\right\}^2 \\ &:= c_2(\epsilon) \end{aligned}$$

Since  $\xi_z \in L_{k,z}$ , we have  $\xi_z = tz + (1-t)e_k$  for some  $t \in (0, 1)$ . As consequence, we obtain the following estimates

for  $\xi_z$ :

$$\begin{aligned} \|\xi_z - e_k\|_\infty &\leq t\|z - e_k\|_\infty \leq c_1(\epsilon), \\ \|\xi_z - e_k\|_2^2 &\leq t^2\|z - e_k\|_2^2 \leq c_2(\epsilon), \\ \|\xi_z\|_2 &\leq t\|z\|_2 + (1-t)\|e_k\|_2 \leq \frac{1}{\sqrt{1-\epsilon}}. \end{aligned}$$

For notational simplicity, in the following we ignore the subscript  $z$  in  $\xi_z$ . We show that each term in

$P'P \text{diag}(\xi) + \text{diag}(\xi)P'P + \text{diag}(P'P\xi) - 2 \text{diag}(\xi)$  is close to  $e_k e_k'$ , except the last term which is close to  $2e_k e_k'$ . The first term is bounded as follows:

$$\begin{aligned} &\|P'P \text{diag}(\xi) - e_k e_k'\| \\ &\leq \|P'P \text{diag}(\xi) - P'Pe_k e_k'\| + \|P'Pe_k e_k' - e_k e_k'\| \\ &\leq \|P'P\| \|\xi - e_k\|_\infty + \|P'P - I\| \\ &\leq (1+\epsilon)c_1(\epsilon) + \epsilon \end{aligned}$$

Similar bounds hold for the term  $\text{diag}(\xi)P'P$ :

$$\begin{aligned} &\|\text{diag}(P'P\xi) - e_k e_k'\| \\ &= \|P'P\xi - e_k\|_\infty \\ &\leq \|P'P\xi - \xi\|_\infty + \|\xi - e_k\|_\infty \\ &\leq \|P'P - I\| \|\xi\|_2 + c_1(\epsilon) \\ &\leq \frac{\epsilon}{\sqrt{1-\epsilon}} + c_1(\epsilon), \end{aligned}$$

and the term  $\text{diag}(\xi)$ :

$$\|\text{diag}(\xi) - e_k e_k'\| \leq \|\xi - e_k\|_\infty \leq c_1(\epsilon).$$

These bounds imply that

$$\begin{aligned} &\|P'P \text{diag}(\xi) + \text{diag}(\xi)P'P + \text{diag}(P'P\xi) - 2 \text{diag}(\xi) \\ &\quad - e_k e_k'\| \\ &\leq 2(1+\epsilon)c_1(\epsilon) + 2\epsilon + \frac{\epsilon}{\sqrt{1-\epsilon}} + c_1(\epsilon) + c_1(\epsilon) \\ &:= c_3(\epsilon) \\ &= O(\epsilon). \end{aligned}$$

Furthermore, we have

$$\begin{aligned} &\|P'Pe_k e_k' P'P - e_k e_k'\| \\ &= \|P'Pe_k e_k' P'P - P'Pe_k e_k' + P'Pe_k e_k' - e_k e_k'\| \\ &\leq \|P'P\| \|e_k e_k'\| \|P'P - I\| + \|P'P - I\| \|e_k e_k'\| \\ &\leq (1+\epsilon)\epsilon + \epsilon \\ &= O(\epsilon). \end{aligned}$$

Therefore, we get

$$\begin{aligned} &\|H(\xi) - (6P'Pe_k e_k' P'P - 3P'P)\| \\ &\leq 6c_3(\epsilon) + 6\epsilon(2+\epsilon) \\ &:= c_4(\epsilon) \\ &= O(\epsilon). \end{aligned}$$

For any  $z \in N_k$ , we next show that  $(z - e_k)'P'Pe_k$  is small



due to the fact that both  $z$  and  $e_k$  lie on  $E^{n-1}$ :

$$\begin{aligned} 1 &= z'P'Pz \\ &= e_k'P'Pe_k + 2(z - e_k)'P'Pe_k + (z - e_k)'P'P(z - e_k) \\ &= 1 + 2(z - e_k)'P'Pe_k + (z - e_k)'P'P(z - e_k) \end{aligned}$$

implying

$$\begin{aligned} |(z - e_k)'P'Pe_k| &= \frac{1}{2}(z - e_k)'P'P(z - e_k) \\ &\leq \frac{1}{2}\|P'P\| \|z - e_k\|_2^2 \\ &\leq \frac{1}{2}(1 + \epsilon)\|z - e_k\|_2^2 \end{aligned}$$

The following chain of inequalities

$$\begin{aligned} &(z - e_k)'H(\xi)(z - e_k) \\ &\leq (z - e_k)'(6P'Pe_k e_k'P'P - 3P'P)(z - e_k) \\ &\quad + \|z - e_k\|_2^2 c_4(\epsilon) \\ &= 6[(z - e_k)'P'Pe_k]^2 - 3(z - e_k)'P'P(z - e_k) \\ &\quad + \|z - e_k\|_2^2 c_4(\epsilon) \\ &= \frac{3}{2}(1 + \epsilon)^2 \|z - e_k\|_2^4 - 3(z - e_k)'P'P(z - e_k) \\ &\quad + \|z - e_k\|_2^2 c_4(\epsilon) \\ &\leq \frac{3}{2}(1 + \epsilon)^2 \|z - e_k\|_2^4 - 3(1 - \epsilon)\|z - e_k\|_2^2 \\ &\quad + \|z - e_k\|_2^2 c_4(\epsilon) \\ &= \frac{3}{2}(1 + \epsilon)^2 \|z - e_k\|_2^4 - (3 - 3\epsilon - c_4(\epsilon))\|z - e_k\|_2^2 \end{aligned}$$

show that the second order term is negative if

$$\frac{3}{2}(1 + \epsilon)^2 \|z - e_k\|_2^2 < 3 - 3\epsilon - c_4(\epsilon)$$

So it suffices to require

$$c_2(\epsilon)\frac{3}{2}(1 + \epsilon)^2 < 3 - 3\epsilon - c_4(\epsilon)$$

Numerical computation shows that the above inequality holds if

$$\epsilon \leq 0.0016.$$

We summarize the above argument into a theorem:

**Theorem 5.** For a symmetric tensor  $A = \sum_{p=1}^r \lambda_p x^p \otimes x^p \otimes x^p$ , if the vectors  $\{x^p\}$  are near orthogonal, that is, the matrix  $X = [x^1 \ x^2 \ \dots \ x^r]$  satisfies

$$\|X'X - I_r\| \leq 0.0016,$$

then there exists a dual symmetric tensor  $Q$  such that the dual polynomial  $q(x) = \langle Q, x \otimes x \otimes x \rangle$  satisfies the conditions in part I of Proposition 1. Thus,  $A = \sum_{p=1}^r \lambda_p x^p \otimes x^p \otimes x^p$  is the unique decomposition that achieves the tensor nuclear norm, and can be found by solving (4).

## 7.5. SOS Dual Certificate: The Non-Orthonormal Case

After rotating to the canonical basis vectors, the dual polynomial we constructed for the orthogonal case is

$$q_0(z) = \sum_{k=1}^r z_k^3$$

while the one for the non-orthogonal case is

$$q(z) = \sum_{k=1}^r [3(z'P'Pe_k) - 2z_k]z_k^2.$$

We first show that  $1 - q(z)$  is an SOS modulo the ellipsoid  $E^{n-1}$ . We know that  $q_0(z)$  is an SOS modulo the sphere, that is, there exist symmetric matrices  $H \succcurlyeq 0$  and  $G \in \mathbb{R}^{(n+1) \times (n+1)}$  such that

$$1 - q_0(z) = \nu_2(z)'H\nu_2(z) + \nu_1(z)'G\nu_1(z)(\|z\|_2^2 - 1).$$

In Section 7.3, we constructed  $G = G_0$  in (26) and  $H = H_0$  in (28). So  $(H_0, G_0)$  is in the feasible set of the following two constraints:

$$\begin{aligned} \nu_2(z)'H\nu_2(z) + \nu_1(z)'G\nu_1(z)(\|z\|_2^2 - 1) &= 1 - q_0(z), \forall z \\ H &\succcurlyeq 0. \end{aligned} \quad (34)$$

Note that any feasible  $H$  must satisfy  $\nu_2(e_i)'H\nu_2(e_i) = 0$  for  $i = 1, 2, \dots, r$ , implying that  $\{\nu_2(e_i) : i = 1, 2, \dots, r\}$  spans a subspace of the null space of  $H$ .

Define matrices  $B_\alpha$  and  $C_\alpha^0$  that satisfy

$$\begin{aligned} \nu_2(z)\nu_2(z)' &= \sum_{|\alpha| \leq 4} B_\alpha z^\alpha \\ \nu_1(z)\nu_1(z)'(\|z\|_2^2 - 1) &= \sum_{|\alpha| \leq 4} C_\alpha^0 z^\alpha \end{aligned}$$

These notations allow us to write

$$\nu_2(z)'H\nu_2(z) = \langle \nu_2(z)\nu_2(z)', H \rangle = \sum_{|\alpha| \leq 4} \langle B_\alpha, H \rangle z^\alpha$$

and

$$\begin{aligned} \nu_1(z)'G\nu_1(z)(\|z\|_2^2 - 1) &= \langle \nu_1(z)\nu_1(z)'(\|z\|_2^2 - 1), G \rangle \\ &= \sum_{|\alpha| \leq 4} \langle C_\alpha^0, G \rangle z^\alpha \end{aligned}$$

Denote by  $b_\alpha^0$  the coefficient for  $z^\alpha$  in  $1 - q_0(z)$ . We write the polynomial equation  $\nu_2(z)'H\nu_2(z) + \nu_1(z)'G\nu_1(z)(\|z\|_2^2 - 1) = 1 - q_0(z)$  equivalently as

$$\langle B_\alpha, H \rangle + \langle C_\alpha^0, G \rangle = b_\alpha^0, |\alpha| \leq 4$$

Therefore, we obtain the SDP formulation of (34)

$$\begin{aligned} &\text{find } G, H \\ &\text{subject to } \langle B_\alpha, H \rangle + \langle C_\alpha^0, G \rangle = b_\alpha^0, |\alpha| \leq 4 \\ &H \succcurlyeq 0. \end{aligned} \quad (35)$$

As aforementioned,  $G_0$  and  $H_0$  defined respectively in (26) and (28) form a feasible point for (35).

Now we switch to the non-orthogonal case, and we would like to show that

$$q(z) = \sum_{k=1}^r [3(z'P'Pe_k) - 2z_k]z_k^2$$

is an SOS module the ellipsoid  $E^{n-1}$ . That is, we want to solve the feasibility problem

find  $G$  and  $H$

subject to

$$\begin{aligned} \nu_2(z)'H\nu_2(z) + \nu_1(z)'G\nu_1(z)(z'P'Pz - 1) &= 1 - q(z) \\ H &\succcurlyeq 0. \end{aligned} \quad (36)$$

or equivalently in SDP

find  $G$  and  $H$

subject to

$$\begin{aligned} \langle B_\alpha, H \rangle + \langle C_\alpha, G \rangle &= b_\alpha, |\alpha| \leq 4 \\ H &\succcurlyeq 0. \end{aligned} \quad (37)$$

Here  $B_\alpha$  is defined as before, while  $b_\alpha$  is the coefficient for  $z^\alpha$  in  $1 - q(z)$  for  $|\alpha| \leq 4$  and  $C_\alpha$  is defined via

$$\nu_1(z)\nu_1(z)'(z'P'Pz - 1) = \sum_{|\alpha| \leq 4} C_\alpha z^\alpha$$

We again note that any feasible  $H$  must satisfy  $\nu_2(e_i)'H\nu_2(e_i) = 0$  for  $i = 1, 2, \dots, r$ , implying that  $\{\nu_2(e_i) : i = 1, 2, \dots, r\}$  spans a subspace of the null space of  $H$ .

When  $\|P'P - I\| \leq \epsilon$  with  $\epsilon$  small,  $C_\alpha$  is close to  $C_\alpha^0$  and  $b_\alpha$  is close to  $b_\alpha^0$ . We claim that, when  $\epsilon$  is sufficiently small, we can always take  $G_1 = G_0$  and  $H_1$  in the neighborhood of  $H_0$  that form a feasible point of (37). Denote  $\Delta H = H_1 - H_0$  and  $e_\alpha = (b_\alpha - b_\alpha^0) - (\langle C_\alpha, G_0 \rangle - \langle C_\alpha^0, G_0 \rangle)$ , then  $\Delta H$  must satisfy

$$\langle B_\alpha, \Delta H \rangle = e_\alpha, |\alpha| \leq 4$$

These set of equality constraints, which are equivalent to

$$\begin{aligned} \nu_2(z)' \Delta H \nu_2(z) &= \sum_{|\alpha| \leq 4} e_\alpha z^\alpha \\ &= q(z) - q_0(z) - \nu_1(z)'G_0\nu_1(z)(z'P'Pz - z'z), \end{aligned}$$

also implies that  $\nu_2(e_i)' \Delta H \nu_2(e_i) = 0, i = 1, \dots, r$ . Therefore,  $\{\nu_2(e_i) : i = 1, 2, \dots, r\}$  spans a subspace of the null spaces of  $H_0, H_1$  and  $\Delta H$ . Since the null space of  $H_0$  is exactly  $\text{span}(\{\nu_2(e_i) : i = 1, 2, \dots, r\})$ , and the minimal non-zero eigenvalue of  $H_0$  is strictly greater than  $1/3$  according to Theorem 4, it suffices to find a symmetric  $\Delta H$  that satisfies

$$\langle B_\alpha, \Delta H \rangle = e_\alpha, |\alpha| \leq 4$$

and  $\|\Delta H\|$  is very small, much smaller than  $\frac{1}{3}$ .

In the following, we will complete the argument by show-

ing that the solution  $\Delta \hat{H}$  to

$$\begin{aligned} &\text{minimize } \|\Delta H\|_F \\ &\text{subject to } \langle B_\alpha, \Delta H \rangle = e_\alpha, |\alpha| \leq 4. \end{aligned} \quad (38)$$

satisfies  $\|\Delta H\|_F \leq 0.0048$  under the conditions of  $\|P'P - I\| \leq 0.0016$ , implying that  $\Delta \bar{H} = \frac{1}{2}(\Delta \hat{H} + \Delta \hat{H}')$  is the desired  $\Delta H$ .

We first estimate  $\|e\|_\infty$ . Note

$$\begin{aligned} q(z) - q_0(z) &= \sum_{k=1}^r [3(z'P'Pe_k) - 2z_k]z_k^2 - \sum_{k=1}^r z_k^3 \\ &= 3 \sum_{k=1}^r [(z'P'Pe_k) - z_k]z_k^2 \end{aligned}$$

which involves only third order monomials in sets  $\{z_k^3 : k = 1, \dots, r\}$ ,  $\{z_k^2 z_j : k = 1, \dots, r; j = r+1, \dots, n\}$ , and  $\{z_k^2 z_j : j \neq k = 1, \dots, r\}$ . The coefficient for  $z_k^3$  is  $3(1 - e_k'P'Pe_k) = 0$ , and the coefficient for  $z_k^2 z_j$  is  $-3e_j'P'Pe_k$ . When  $k = 1, \dots, r; j = r+1, \dots, n$ , we have  $-3e_j'P'Pe_k = 0$  due to the construction of  $P$ ; when  $j \neq k = 1, \dots, r$ , the quantity  $-3e_j'P'Pe_k$  is non-zero. Therefore, we get

$$\|b - b^0\|_\infty \leq 3 \max_{1 \leq j \neq k \leq r} |e_j'P'Pe_k| \leq 3\epsilon.$$

We next bound

$$\begin{aligned} |\langle C_\alpha, G_0 \rangle - \langle C_\alpha^0, G_0 \rangle| &= |\langle C_\alpha - C_\alpha^0, G_0 \rangle| \\ &= \frac{3}{2} |\text{trace}(C_\alpha - C_\alpha^0)| \end{aligned}$$

To control  $\text{trace}(C_\alpha - C_\alpha^0)$ , we write

$$\sum_{|\alpha| \leq 4} (C_\alpha - C_\alpha^0) z^\alpha = \nu_1(z)\nu_1(z)'[z'(P'P - I)z]$$

Taking trace on both sides gives

$$\begin{aligned} &\sum_{|\alpha| \leq 4} \text{trace}(C_\alpha - C_\alpha^0) z^\alpha \\ &= \text{trace}(\nu_1(z)\nu_1(z)') [z'(P'P - I)z] \\ &= \left(1 + \sum_{i=1}^r z_i^2\right) [z'(P'P - I)z] \\ &= \left(1 + \sum_{i=1}^r z_i^2\right) \sum_{1 \leq j \neq k \leq r} (P'P - I)_{jk} z_j z_k \end{aligned}$$

Since the diagonal of  $P'P - I$  constitutes of zeros, the only monomials that have non-zero coefficients are in the sets  $\{z_i^2 z_j z_k : 1 \leq i \leq r, 1 \leq j \neq k \leq r\}$ , and  $\{z_j z_k : 1 \leq j \neq k \leq r\}$ . To compute the coefficients for  $z_i^2 z_j z_k$ , we consider two separate cases. When  $j = i$ , the coefficient for the term  $z_i^3 z_k$  is  $(P'P - I)_{ik} + (P'P - I)_{ki}$ . When  $j \neq i$  and  $k \neq i$ , the coefficient for the term  $z_i^2 z_j z_k$  is  $(P'P - I)_{jk} + (P'P - I)_{kj}$ . In both cases, we can bound

the absolute value of the coefficient by

$$\max_{j \neq k} |(P'P - I)_{jk} + (P'P - I)_{kj}| \leq 2\epsilon.$$

A similar argument shows that the coefficients for  $z_j z_k$  with  $1 \leq j \neq k \leq r$  are also bounded by  $2\epsilon$ . Hence, we get

$$\max_{|\alpha| \leq 4} |\text{trace}(C_\alpha - C_\alpha^0)| \leq 2\epsilon.$$

Since the components of  $b_\alpha - b_\alpha^0$  and  $\langle C_\alpha - C_\alpha^0, G_0 \rangle$  attain non-zero at different  $\alpha$ s, we conclude that

$$\|e\|_\infty \leq 3\epsilon.$$

Denote by  $S \in \mathbb{R}^{|\mathbb{N}_4^n| \times |\mathbb{N}_2^n|^2}$  the matrix whose  $\alpha$ th row is  $\text{vec}(B_\alpha)^T$  for  $|\alpha| \leq 4$ . The solution to (38) is given by  $\text{vec}(\Delta H) = S^\dagger e$  where we used  $\dagger$  to represent pseudo-inverse.

We want to control

$$\|S^\dagger\|_{\infty,2} = \max_\alpha \| [S^\dagger]_\alpha \|_2$$

where  $[S^\dagger]_\alpha$  is the  $\alpha$ th row of  $S^\dagger$ . Note  $S$  has orthogonal rows, and each  $\text{vec}(B_\alpha)$  is composed of zeros and ones, and the ones indicate where the monomial  $z^\alpha$  locates in  $\nu_2(z)\nu_2(z)'$ . As a consequence, the matrix  $SS'$  is diagonal with the diagonal element  $d_\alpha$  counts the number of appearances of  $z^\alpha$  in  $\nu_2(z)\nu_2(z)'$ , which is always greater than or equal to 1. Therefore, we get

$$\begin{aligned} \|S^\dagger\|_{\infty,2} &= \|S'(SS')^{-1}\|_{\infty,2} \\ &\leq \max_\beta \| [S']_\beta \text{diag}(d^{-1}) \|_2 \\ &\leq \max_\beta \|S^\beta\|_2 \end{aligned}$$

where  $S^\beta$  represents that  $\beta$ th column of  $S$ . The index  $\beta$  indexes the rows and columns of  $\nu_2(z)\nu_2(z)'$ . Each column of  $S$  consists of zeros and a single one, with the latter representing which  $z^\alpha$  is at the entry of  $\nu_2(z)\nu_2(z)'$  specified by the column index  $\beta$ . Therefore, we obtain

$$\|S^\dagger\|_{\infty,2} \leq \max_\beta \|S^\beta\|_2 \leq 1$$

We conclude that

$$\begin{aligned} \|\Delta \bar{H}\|_F &\leq \|\Delta \hat{H}\|_F \\ &= \|S^\dagger e\|_2 \leq \|S^\dagger\|_{\infty,2} \|e\|_\infty \\ &\leq 3\epsilon \\ &\leq 0.0048 \end{aligned}$$

for  $\epsilon \leq 0.0016$ . Therefore, the minimal non-zero eigenvalue of the Gram matrix  $H_1 = H_0 + \Delta \bar{H}$  is lower bounded by  $1/3 - 0.0048 > 0$ .

So far we have showed that  $q(z)$  is an SOS modulo the ellipsoid  $\{z : z'P'Pz = 1\}$ . To prove Theorem 1, we need to map  $z$  back to  $x$ , and make sure that after the mapping,

the new Gram matrix still have rank  $|\mathbb{N}_2^n| - r$ . It suffices to show that the change of basis transformation on  $\mathbb{R}^n$  that maps  $x$  to  $z$  induces a well-conditioned transformation between  $\nu_2(x)$  and  $\nu_2(z)$ . This is given in Lemma 1 developed in the next section. Therefore, we have completed the proof of Theorem 1.

## 7.6. Change of Basis Formular

Consider two  $n$ -dimensional variables  $x$  and  $z$  linked by a change of basis transformation  $x = Pz$  or  $z = P^{-1}x$ . We aim at finding the matrix  $J$  that expresses  $\nu_2(z)$  in terms of  $\nu_2(x)$ , i.e.,

$$\nu_2(z) = \nu_2(P^{-1}x) = J\nu_2(x).$$

The transform  $J$  is well defined since a polynomial of degree  $k$  in  $z$  is always transformed into a polynomial of degree  $k$  in  $x$  under  $z = P^{-1}x$ . It's easy to see  $J$  has the form:

$$J = \begin{bmatrix} 1 & & \\ & P^{-1} & \\ & & J_2 \end{bmatrix}$$

where  $J_2$  expresses all quadratic monomials of  $z$  in terms of quadratic monomials of  $x$ . To find  $J_2$ , we rewrite the relationship  $zz' = P^{-1}xx'P^{-1}$  as

$$\text{vec}(zz') = P^{-1} \otimes_K P^{-1} \text{vec}(xx')$$

where the subscript in the Kronecker product notation  $\otimes_K$  is used to distinguish it from the tensor product notation  $\otimes$ , and  $\text{vec}(\cdot)$  vectorizes a matrix column-wise. Denote by  $\bar{\nu}_2(x)$  all unique quadratic monomials in  $x$ , and write  $\bar{\nu}_2(x) = \Pi \text{vec}(xx')$ , where  $\Pi$  is the matrix that picks and averages the duplicated quadratic monomials of  $x$  in  $\text{vec}(xx')$ . One can verify that  $\text{vec}(xx') = \Pi^\dagger \bar{\nu}_2(x)$ , and the smallest and largest singular values of  $\Pi$  are  $\frac{1}{\sqrt{2}}$  and 1 respectively. Consequently, we have

$$\bar{\nu}_2(z) = \Pi \text{vec}(zz') = \Pi (P^{-1} \otimes_K P^{-1}) \Pi^\dagger \bar{\nu}_2(x),$$

or equivalently  $J_2 = \Pi P^{-1} \otimes_K P^{-1} \Pi^\dagger$ . So if  $\|PP' - I\| \leq \epsilon$ , the singular values of  $J_2$  are lower bounded and upper bounded by  $\frac{1}{\sqrt{2}} \frac{1}{1+\epsilon}$  and  $\frac{\sqrt{2}}{1-\epsilon}$  respectively. The same holds for  $J$ . We summarize these results in the following lemma.

**Lemma 1.** *The change of basis transformation  $x = Pz$  induces a linear transformation between  $\nu_2(z)$  and  $\nu_2(x)$*

$$\nu_2(z) = J\nu_2(x) = \begin{bmatrix} 1 & & \\ & P^{-1} & \\ & & \Pi (P^{-1} \otimes_K P^{-1}) \Pi^\dagger \end{bmatrix} \nu_2(x)$$

*such that the singular values of  $J$  fall into the interval  $[\frac{1}{\sqrt{2}} \frac{1}{1+\epsilon}, \frac{\sqrt{2}}{1-\epsilon}]$ .*
